# Supplementary material for: CasRx-Based Kras G12D Silencing for In Vivo Tumor Inhibition in Spontaneous Lung Adenocarcinoma
Source: Research Square preprint supplement (doi:10.21203/rs.3.rs-4041534/v1), 2024-03-15
Supplement: Supplementary file 1 [file 20716f978934d79e08eaa802.docx]

Table I: The Sequencing coverage and quality statistics of the transcriptional sequencing for lungs received the CasRx-therapy at the early stage of tumorigenesis for 2 weeks

| Sample ID | Total number of sequenced reads | Total number of uniquely mapped readsa | RNA integrity number (RIN) | Ratio of all reads aligned to rRNA regions to total uniquely mapped reads (rRNA rate) | Ratio of exon-mapped reads to total uniquely mapped reads (Expression Profile Efficiency) | Total number of detected transcripts with reads≥1b |
| --- | --- | --- | --- | --- | --- | --- |
| Sample1 | 54,519,624 | 49,155,532 | 9.0 | 1/49,155,532 | 0.8985 | 94323 |
| Sample2 | 53,839,762 | 46,883,176 | 8.8 | 1/46,883,176 | 0.8138 | 92801 |
| Sample3 | 51,592,538 | 46,281,933 | 8.8 | 1/46,281,933 | 0.8739 | 91874 |
| Sample4 | 52,651,766 | 47,777,256 | 8.8 | 1/47,777,256 | 0.8713 | 94702 |
| Sample5 | 48,197,824 | 44,733,977 | 8.9 | 1/44,733,977 | 0.8406 | 94964 |
| Sample6 | 53,773,548 | 48,638,984 | 8.2 | 2/48,638,984 | 0.8558 | 93858 |
| Sample7 | 66,829,534 | 59,301,805 | 8.5 | 0/59,301,805 | 0.9026 | 93734 |
| Sample8 | 56,439,502 | 49,494,910 | 8.6 | 0/49,494,910 | 0.8642 | 89514 |
| Sample9 | 50,302,286 | 45,756,808 | 9.1 | 0/45,756,808 | 0.8513 | 96516 |

(The expression of the interested genes were analyzed and shown in Fig. 3a-c,3i,j and Fig.S3)

a Specify in table description or legend which reference genome was used (e.g., GRCh38).

b A higher minimum coverage threshold is permitted.

Table II: The Sequencing coverage and quality statistics of the transcriptional sequencing for lungs received the CasRx-therapy at the early stage of tumorigenesis for 12 weeks.

| Sample ID | Total number of sequenced reads | Total number of uniquely mapped readsa | RNA integrity number (RIN) | Ratio of all reads aligned to rRNA regions to total uniquely mapped reads (rRNA rate) | Ratio of exon-mapped reads to total uniquely mapped reads (Expression Profile Efficiency) | Total number of detected transcripts with reads≥1b |
| --- | --- | --- | --- | --- | --- | --- |
| Sample10 | 50,281,870 | 44,992,783 | 8.2 | 0/44,992,783 | 0.8968 | 90721 |
| Sample11 | 46,529,092 | 42,145,187 | 7.9 | 0/42,145,187 | 0.9232 | 87732 |
| Sample12 | 50,572,064 | 46,109,236 | 9.3 | 3/46,109,236 | 0.8943 | 93229 |
| Sample13 | 54,840,894 | 49,987,951 | 8.2 | 1/49,987,951 | 0.9135 | 91570 |
| Sample14 | 52,065,646 | 48,133,314 | 7.7 | 1/48,133,314 | 0.9325 | 91364 |
| Sample15 | 54,465,030 | 50,218,639 | 7.9 | 0/50,218,639 | 0.9127 | 92229 |
| Sample16 | 49,451,294 | 45,245,341 | 9.2 | 1/45,245,341 | 0.9020 | 90599 |
| Sample17 | 53,591,338 | 48,574,656 | 8.2 | 0/48,574,656 | 0.8896 | 91015 |
| Sample18 | 54,189,370 | 49,030,160 | 9.0 | 0/49,030,160 | 0.9103 | 92427 |

(The expression of the interested genes were analyzed and shown in Fig. 3i-l)

a Specify in table description or legend which reference genome was used (e.g., GRCh38).

b A higher minimum coverage threshold is permitted.

Table III: The Sequencing coverage and quality statistics of the transcriptional sequencing for tumors treated with CasRx-therapy for 6 weeks

| Sample ID | Total number of sequenced reads | Total number of uniquely mapped readsa | RNA integrity number (RIN) | Ratio of all reads aligned to rRNA regions to total uniquely mapped reads (rRNA rate) | Ratio of exon-mapped reads to total uniquely mapped reads (Expression Profile Efficiency) | Total number of detected transcripts with reads≥1b |
| --- | --- | --- | --- | --- | --- | --- |
| Sample19 | 48,737,646 | 45,032,019 | 8.2 | 0/45,032,019 | 0.9337 | 90276 |
| Sample20 | 51,261,848 | 47,376,184 | 8.9 | 1/47,376,184 | 0.9315 | 91404 |
| Sample21 | 48,911,336 | 45,319,434 | 8.3 | 1/45,319,434 | 0.9401 | 89758 |
| Sample22 | 47,965,878 | 44,504,633 | 9.2 | 0/44,504,633 | 0.9490 | 88837 |
| Sample23 | 50,178,924 | 46,164,361 | 8.5 | 1/46,164,361 | 0.9456 | 88381 |
| Sample24 | 51,581,658 | 47,355,092 | 8.5 | 0/47,355,092 | 0.9355 | 88386 |
| Sample25 | 52,074,478 | 47,850,320 | 7.8 | 2/47,850,320 | 0.9352 | 90324 |
| Sample26 | 55,649,096 | 51,429,414 | 9.3 | 1/51,429,414 | 0.9413 | 91442 |
| Sample27 | 50,202,092 | 46,261,073 | 9.3 | 0/46,261,073 | 0.9313 | 90260 |
| Sample28 | 47,283,766 | 43,713,170 | 9.6 | 1/43,713,170 | 0.9474 | 88684 |

(The expression of the interested genes were analyzed and shown in Fig. 6a,f-h, and Fig. S6)

a Specify in table description or legend which reference genome was used (e.g., GRCh38).

b A higher minimum coverage threshold is permitted.
