# Supplementary material for: CasRx-Based Kras G12D Silencing for In Vivo Tumor Inhibition in Spontaneous Lung Adenocarcinoma
Source: Research Square preprint supplement (doi:10.21203/rs.3.rs-4041534/v1), 2024-03-15
Supplement: Supplementary file 2 [file b93b80022b702ee3a5bd0177.docx]

Table 1: The sequence of the sgRNAs for *KrasG12D* and the primers for RT-PCR

| Names | Sequence (5´→3´) | Applifications |
| --- | --- | --- |
| sgRNA1 | CATCTGCTCCAACCACCACAAGTTTATACT |  |
| sgRNA2 | GCGATCAGCTCCAACCACCACAAGTTTATA |  |
| sgRNA3 | TCAGCTCCAACCACCACAAGTTTATACTCA |  |
| sgRNA4 | CATCAGCTCCAACCACCACAAGTTTATACT |  |
| sgRNA5 | GCCATCAGCTCCAACCACCACAAGTTTATA |  |
| sgRNA6 | CCTACGCCATCAGCTCCAACCACCACAAGT |  |
| sgRNA7 | GGCGCTCTTGCCTACGCCATCAGCTCCAAC |  |
| sgNC | GGGTCTTCGAGAAGACC |  |
| *KrasG12D*Primer Forward | CTTGTGGTGGTTGGAGCTGA | Fig.1d, Fig.2d,e, and Fig. S1c |
| *Wildtype Kras* Primer Forward | CTTGTGGTGGTTGGAGCTGG |
| *Kras* Common Reverse | GTAGGAGTCCTCTATCGTAG |
| *CasRx* Primer Forward | AAGGGCTTTAGCTCCGTGAC | Fig.2c |
| *CasRx* Primer Reverse | GTTGGCGTACAGCTTAGGGT |
| *hGAPDH* Forward | TGGGCTACACTGAGCACCAG | Fig.1d and Fig.S1c |
| *hGAPDH* Reverse | GGGTGTCGCTGTTGAAGTCA |
| *mGAPDH* Forward | TGTGATGGGTGTGAACCACGAGAA | Fig.2c-e |
| *mGAPDH* Reverse | CTGTGGTCATGAGCCCTTCCACAA |
